# Supplementary material
Source: PubMed Central journal article supplement (PMC3362656)
Supplement: NIHMS375426-supplement-Figure_S1.pdf [file NIHMS375426-supplement-Figure_S1.pdf]

**Fig. S1. Sequences of transgenes and probes used in Fujioka et al., 2012.**

| transgenes and probes | relative to TSS of <i>slp1</i> (nt) |       | R. enzyme sites |       | Flybase (r5.22) coordinates |         | sequence of: 5' end                                      | 3' end, reverse complement      |
|-----------------------|-------------------------------------|-------|-----------------|-------|-----------------------------|---------|----------------------------------------------------------|---------------------------------|
|                       |                                     |       | 5'              | 3'    |                             |         |                                                          |                                 |
| u8766                 | -8713                               | -6509 |                 |       | 3816967                     | 3819171 | TAGAGCCTTCAAAGGTTTGCTAAAAGTTT                            | GGCTAACTGACTCAAGTACTAGTTGAAATC  |
| u8781                 | -8713                               | -8072 |                 | Bgl2  | 3816967                     | 3817608 | TAGAGCCTTCAAAGGTTTGCTAAAAGTTT                            | GATCTTCAATCACATCCCCTTGGC        |
| u8172                 | -8075                               | -7148 | Bgl2            | EcoRI | 3817605                     | 3818532 | GATCTTCAGGATATTCAGCACATGCAT                              | AATTCGTCGCAGTCTGAGGATTTTC       |
| u8166                 | -8075                               | -6509 | Bgl2            |       | 3817605                     | 3819171 | GATCTTCAGGATATTCAGCACATGCAT                              | GGCTAACTGACTCAAGTACTAGTTGAAATC  |
| u8159                 | -8075                               | -5868 | Bgl2            | Pvu2  | 3817605                     | 3819812 | GATCTTCAGGATATTCAGCACATGCAT                              | CTGGCAAATTTTGTGATGACCAATGGTTGAG |
| u7250                 | -7174                               | -4993 |                 |       | 3818506                     | 3820687 | GTGAAAATCCTAGCACTGCGACGAATTC                             | CGCCTTATCATCGTCGCCGTGATTTTC     |
| u5534                 | -5512                               | -3440 |                 |       | 3820168                     | 3822240 | GCGTCCACAGTCCACAGTCCGCAGGA                               | CTGCACTTCAGGTAGTGGGGTAAATC      |
| u5547                 | -5512                               | -4671 |                 | Nhe1  | 3820168                     | 3821009 | GCGTCCACAGTCCACAGTCCGCAGGA                               | CTAGCTCCCTTCACTCTTCTCGAT        |
| u4734                 | -4675                               | -3440 | Nhe1            |       | 3821005                     | 3822240 | GCTAGCTGGGAGATTGATCTACGAAT                               | CTGCACTTCAGGTAGTGGGGTAAATC      |
| u4739                 | -4675                               | -3937 | Nhe1            | Nsi1  | 3821005                     | 3821743 | GCTAGCTGGGAGATTGATCTACGAAT                               | TAAAACTGGAAGGATCTCGTCGGCT       |
| u3918                 | -3929                               | -1777 |                 |       | 3821751                     | 3823903 | TGTCGGCAATCCCAGTGCCAACCGCA                               | ACAATGGAGGAGTTGGGAAGAAAAA       |
| u3925                 | -3929                               | -2522 |                 | Aat2  | 3821751                     | 3823158 | TGTCGGCAATCCCAGTGCCAACCGCA                               | CGTGGTAAAACGAATTGATTAGCGA       |
| u3931                 | -3929                               | -3056 |                 |       | 3821751                     | 3822624 | TGTCGGCAATCCCAGTGCCAACCGCA                               | ATCTTCGCATTTGTCGCGCACAGC        |
| <b>B1</b>             | -3929                               | -3750 |                 |       | 3821751                     | 3821930 | TGTCGGCAATCCCAGTGCC                                      | GCCTTTGACAACCTTATAGC            |
| <b>B1a</b>            | -3911                               | -3869 |                 |       | 3821769                     | 3821811 | <i>CCAACCGCATGGACAACCTTAATCAATAAGTCGCAGTCGCGCC</i>       |                                 |
| <b>B1 mut a</b>       |                                     |       |                 |       |                             |         | <i>CCAACCGCATGGC<b>CAACTCGCG</b>CAATAAGTCGCAGTCGCGCC</i> |                                 |
| <b>B1b</b>            | -3841                               | -3800 |                 |       | 3821839                     | 3821880 | <i>GTGCCTCGGTGTGGAAGTATCAATTATAGTGGGTGTGACT</i>          |                                 |
| <b>B1 mut b</b>       |                                     |       |                 |       |                             |         | <i>GTGCCTCGGTGTGGAAGT<b>CGCAGC</b>ATAGTGGGTGTGACT</i>    |                                 |
| <b>B2</b>             | -3809                               | -3630 |                 |       | 3821871                     | 3822050 | GGTGTGACTGTACGCTTGG                                      | ATGTTCTCCTCTTCAAAGCC            |
| <b>B3</b>             | -3689                               | -3519 |                 |       | 3821991                     | 3822161 | TTGACACACATATGGTTAGG                                     | GAATGAGCATCTCGAAAGCC            |
| <b>B4</b>             | -3569                               | -3402 |                 |       | 3822111                     | 3822278 | CATATTTATGTTTGAAGTC                                      | GCCTTACGATCTGGTTTAC             |
| <b>B5</b>             | -3454                               | -3270 |                 |       | 3822226                     | 3822410 | CTACCTGAAGTGAGATTGGC                                     | ATCAGGTCCTTCACTCGGGC            |
| u3118                 | -3055                               | -1777 | EcoRV           |       | 3822625                     | 3823903 | ATCCTGCTGATGTCGAGCCATGTGACA                              | ACAATGGAGGAGTTGGGAAGAAAAA       |
| u3125                 | -3055                               | -2522 | EcoRV           | Aat2  | 3822625                     | 3823158 | ATCCTGCTGATGTCGAGCCATGTGACA                              | CGTGGTAAAACGAATTGATTAGCGA       |
| u3923                 | -3929                               | -2303 |                 |       | 3821751                     | 3823377 | TGTCGGCAATCCCAGTGCCAACCGCA                               | GCACACTGCATAGAGTAATGGGTAATTCGA  |
| u3725                 | -3679                               | -2522 | Nde1            | Aat2  | 3822001                     | 3823158 | TATGGTTAGAAATAAAAATAAAATTTAGAT                           | CGTGGTAAAACGAATTGATTAGCGA       |
| u2316                 | -2324                               | -1648 |                 | EcoRV | 3823356                     | 3824032 | CCCATTACTCTATGCAGTGTGCATAAA                              | ATCTTAGACAACCTTGACAAAACATCA     |
| u1609                 | -1647                               | -941  | EcoRV           | Nru1  | 3824033                     | 3824739 | ATCAAACGCACAGTCCGCCGACAAGTA                              | CGACAGATTTGCGAATTAGTTCTGGG      |
| u0900                 | -940                                | 121   | Nru1            |       | 3824740                     | 3825800 | CGAAACTAGAACAAATCCCGG                                    | ATTTCACTTTTACCATTTTTCTGATT      |
| <i>slp1</i> mRNA      | 1                                   | 1458  |                 |       | 3825680                     | 3827137 |                                                          |                                 |
| <b>A0</b>             | 1515                                | 1692  |                 |       | 3827194                     | 3827371 | TTGGATCGAGTTATCGACAC                                     | (C)GCTGGAGGAGCTGGGTAAATA        |
| <b>A0-1</b>           | 1531                                | 1560  |                 |       | 3827210                     | 3827239 | ACACTTGAAAAATATTCATCAGTGAATAAG                           |                                 |
| <b>A0-2</b>           | 1618                                | 1647  |                 |       | 3827297                     | 3827326 | TCTTTTCCGTTGACCATCAGCTGCTGTCC                            |                                 |
| <b>A0-3</b>           | 1515                                | 1562  |                 |       | 3827194                     | 3827241 | TTGGATCGAG                                               |                                 |
| <b>A0-4</b>           | 1559                                | 1618  |                 |       | 3827238                     | 3827297 | AGACTTAATG                                               |                                 |
| <b>A0-5</b>           | 1642                                | 1692  |                 |       | 3827321                     | 3827371 | GCTGTCCAGC                                               |                                 |
| <b>A1</b>             | 1601                                | 1800  |                 |       | 3827280                     | 3827479 | CTGAGAACTCAGCAGTCTCT                                     | TTTTGAACCTCATCCTCTGGC           |
| <b>A1a</b>            | 1689                                | 1730  |                 |       | 3827368                     | 3827409 | CAGCAACTTGCTTTCATCCTGATGACTTAATTAGTTGTTGC                |                                 |
| <b>A1a'</b>           | 1695                                | 1737  |                 |       | 3827374                     | 3827416 | CTTGCTTTCA                                               |                                 |
| <b>A1-1</b>           | 1672                                | 1768  |                 |       | 3827351                     | 3827447 | ATTTACCCAG                                               |                                 |
| <b>A2</b>             | 1739                                | 1898  |                 |       | 3827418                     | 3827577 | GCGGCAACATGAAAATGATTC                                    | CGGATCGTACCTGCGGTGCC            |
| <b>A2a</b>            | 1788                                | 1829  |                 |       | 3827467                     | 3827508 | ATGAGGTTCAAATGAGCCATCACCCATTGACTCGATTTGT                 |                                 |
| <b>A2a-mut</b>        |                                     |       |                 |       |                             |         | ATGAGGTTCC <b>CGACTGAGCAGGCACCCAGGTTCTCGATCGTGT</b>      |                                 |
| <b>A2-1</b>           | 1815                                | 1897  |                 |       | 3827494                     | 3827576 | TTGACTCGAT                                               |                                 |
| <b>A3</b>             | 1841                                | 2020  |                 |       | 3827520                     | 3827699 | CATGCCAGTGACAACCTCC                                      | AGTGTGCCCGTGGACAGAG             |
| <b>A4</b>             | 1961                                | 2108  |                 |       | 3827640                     | 3827787 | CATGAACCCAGCCAGGCC                                       | CCCAGTGTAGCGCACATATTAG          |
| <b>A5</b>             | 2081                                | 2284  |                 |       | 3827760                     | 3827963 | TCTTAACTAATATGTGCGC                                      | GTCCCTGGCTTACGCTGTG             |
| i1523                 | 1517                                | 2293  |                 | Stu1  | 3827196                     | 3827972 | GGATCGAGTTATCGACACTTGAAAAA                               | CCTAGAAAAGTCCCTGGCTTACGCT       |
| i2330                 | 2291                                | 3007  |                 | Stu1  | 3827970                     | 3828686 | AGGCCTCAATTTGAAAGATG                                     | GGTAACCCCAACCTGTTAACTGATTTA     |

p-hs-FLAG-eve sequence of coding region 5' end *AGATCTCCAACATGACTACAAGGACGACGATGACAAGGCTAGCATGCACGGATACCGA...*  
in pCaSpeR-hs Bgl2 **Met** FLAG Nhe1 **Met-eve** coding

Column headings indicate the information contained therein. For B1a, *italicized* sequences are included in the transgene of Fig. 7 but not the probes of Fig. 6C,D. For B1a mut a, mutations (indicated by **bold, underlined**) were incorporated into the probes of Fig. 6B and within the u4734-mut transgene in Fig. 5. For B1b, *italicized* sequences are included in the transgene of Fig. 7 but not the probes used to test binding *in vitro*. For B1 mut b, mutations (**bold, underlined**) were incorporated into the probes of Fig. 6B. For A1a, *italicized* sequences are included in the transgene of Fig. 7 but not in the probes used in Fig. 3B,D. For A2a, *italicized* sequences are included in the transgene of Fig. 7 but not in the probe used in Fig. 3E. For A2a-mut, mutations (**bold, underlined**) were incorporated into the A2a-mut and the A1a-A2a-mut transgenes in Fig. 4.
